# Supplementary material for: Neurotransmitter-derived lipidoids (NT-lipidoids) for enhanced brain delivery through intravenous injection
Source: PubMed Central journal article supplement — Sci Adv. 2020 Jul 24;6(30):eabb4429. doi: 10.1126/sciadv.abb4429 (PMC7439549; doi:10.1126/sciadv.abb4429), 2020-07-24
Supplement: abb4429_SM.pdf [file abb4429_SM.pdf]

## Supplementary Materials for

### **Neurotransmitter-derived lipidoids (NT-lipidoids) for enhanced brain delivery through intravenous injection**

Feihe Ma, Liu Yang, Zhuorui Sun, Jinjin Chen, Xuehui Rui, Zachary Glass, Qiaobing Xu\*

\*Corresponding author. Email: [Qiaobing.Xu@tufts.edu](mailto:Qiaobing.Xu@tufts.edu)

Published 24 July 2020, *Sci. Adv.* **6**, eabb4429 (2020)

DOI: [10.1126/sciadv.abb4429](https://doi.org/10.1126/sciadv.abb4429)

#### **This PDF file includes:**

Figs. S1 to S10

#4899 Ac 10 IT: 0.348 ST: 0.82 uS: 5 NL: 4.92E7  
F: ITMS + c ESI Full ms (150.00-2000.00)

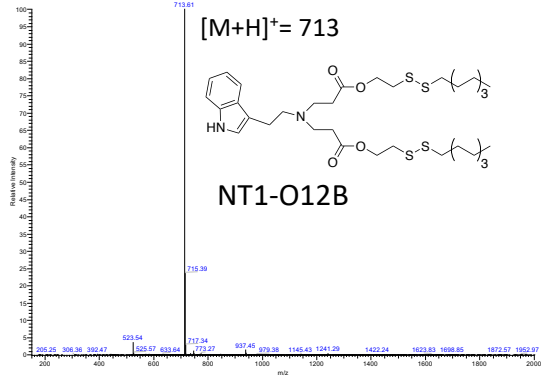

#6049 IT: 0.401 ST: 0.82 uS: 5 NL: 3.86E7  
F: ITMS + c ESI Full ms (150.00-2000.00)

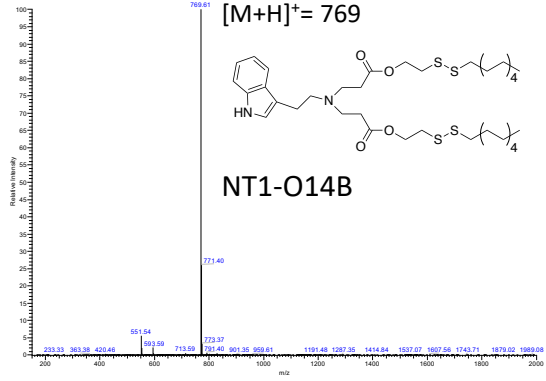

#3781 IT: 0.423 ST: 0.17 uS: 1 NL: 3.57E7  
F: ITMS + c ESI Full ms (150.00-2000.00)

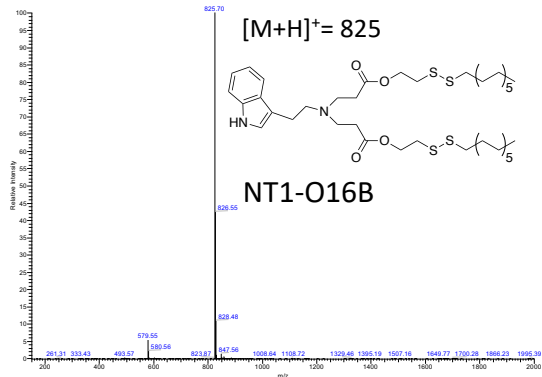

#6113 IT: 0.344 ST: 0.82 uS: 5 NL: 3.81E7  
F: ITMS + c ESI Full ms (150.00-2000.00)

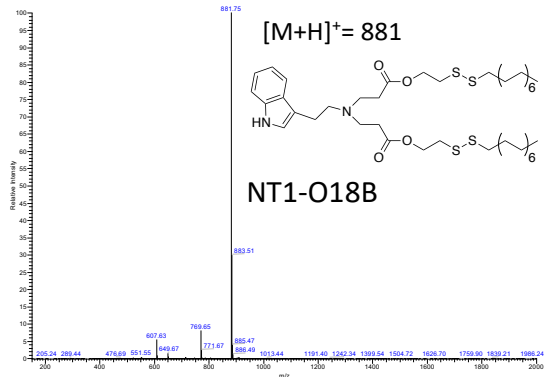

#6860 IT: 0.359 ST: 0.82 uS: 5 NL: 3.82E7  
F: ITMS + c ESI Full ms (150.00-2000.00)

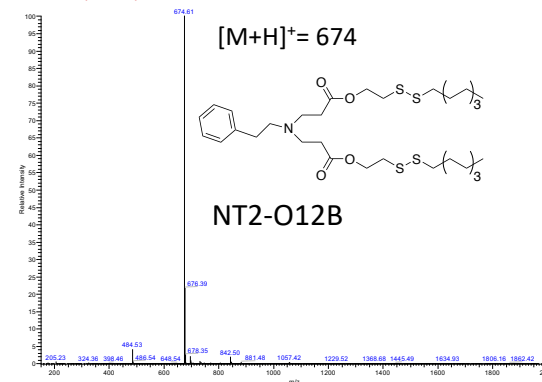

#6372 IT: 0.372 ST: 0.82 uS: 5 NL: 2.97E7  
F: ITMS + c ESI Full ms (150.00-2000.00)

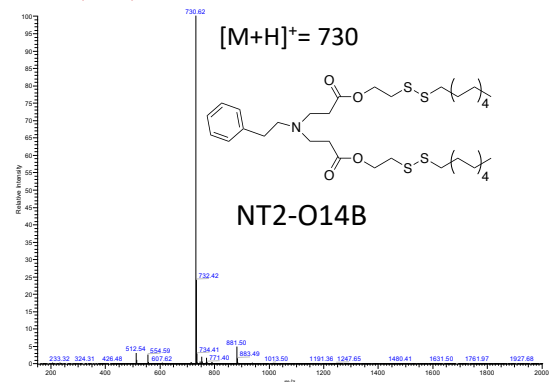

#7815 IT: 20.851 ST: 0.20 uS: 1 NL: 3.18E4  
F: ITMS + p ESI Full ms (150.00-2000.00)

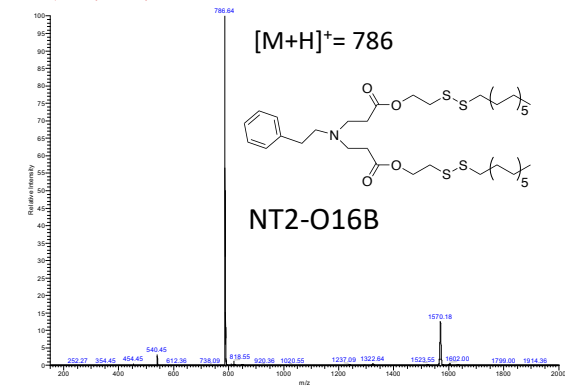

#6823 IT: 0.320 ST: 0.82 uS: 5 NL: 2.27E7  
F: ITMS + c ESI Full ms (150.00-2000.00)

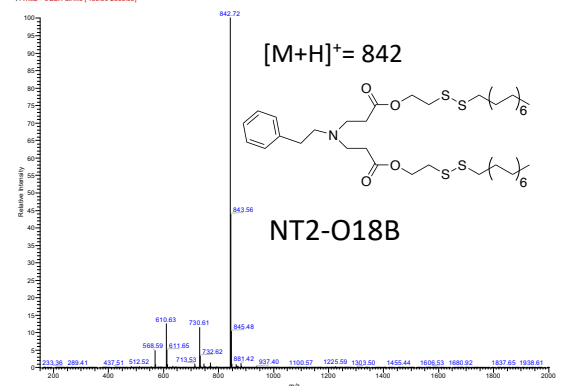



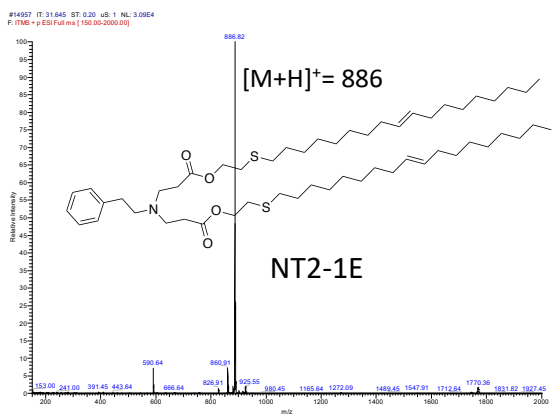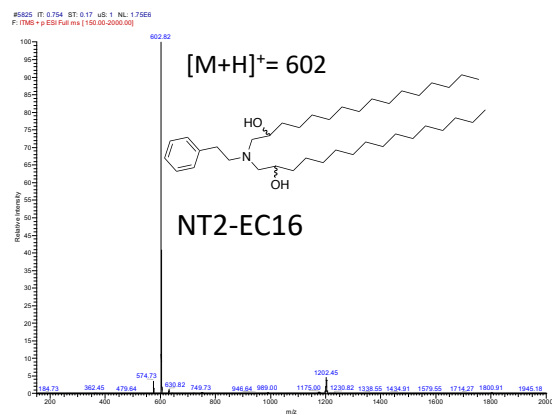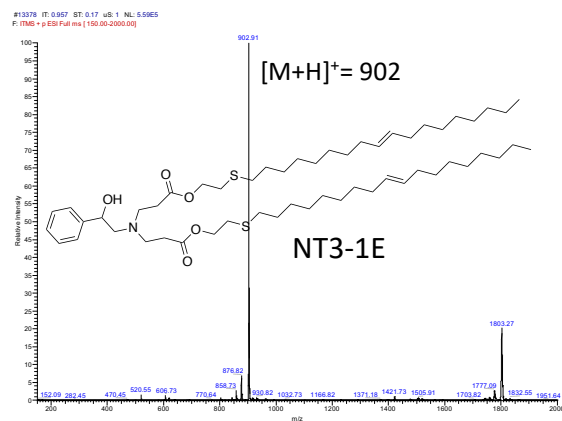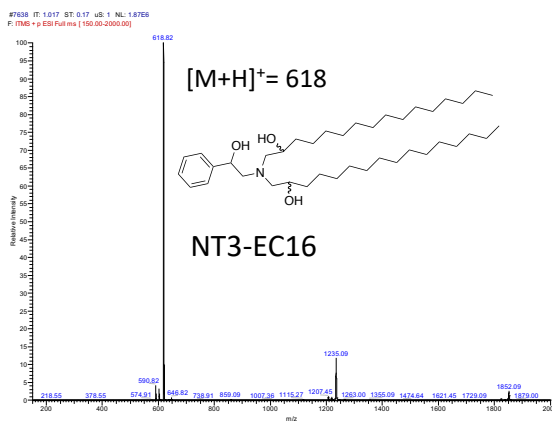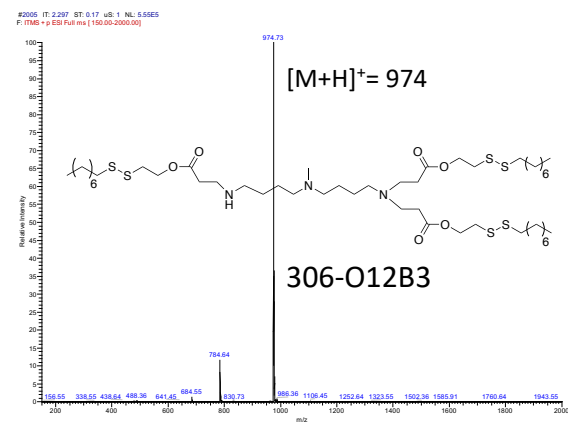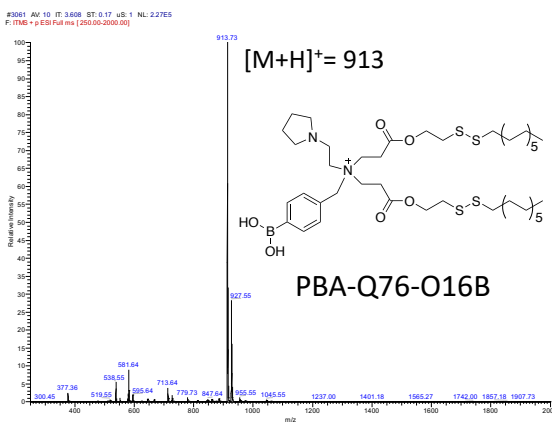

**Fig. S1. Chemical structure and ESI-MS Characterization of NT-lipidoids and doping lipidoids.**



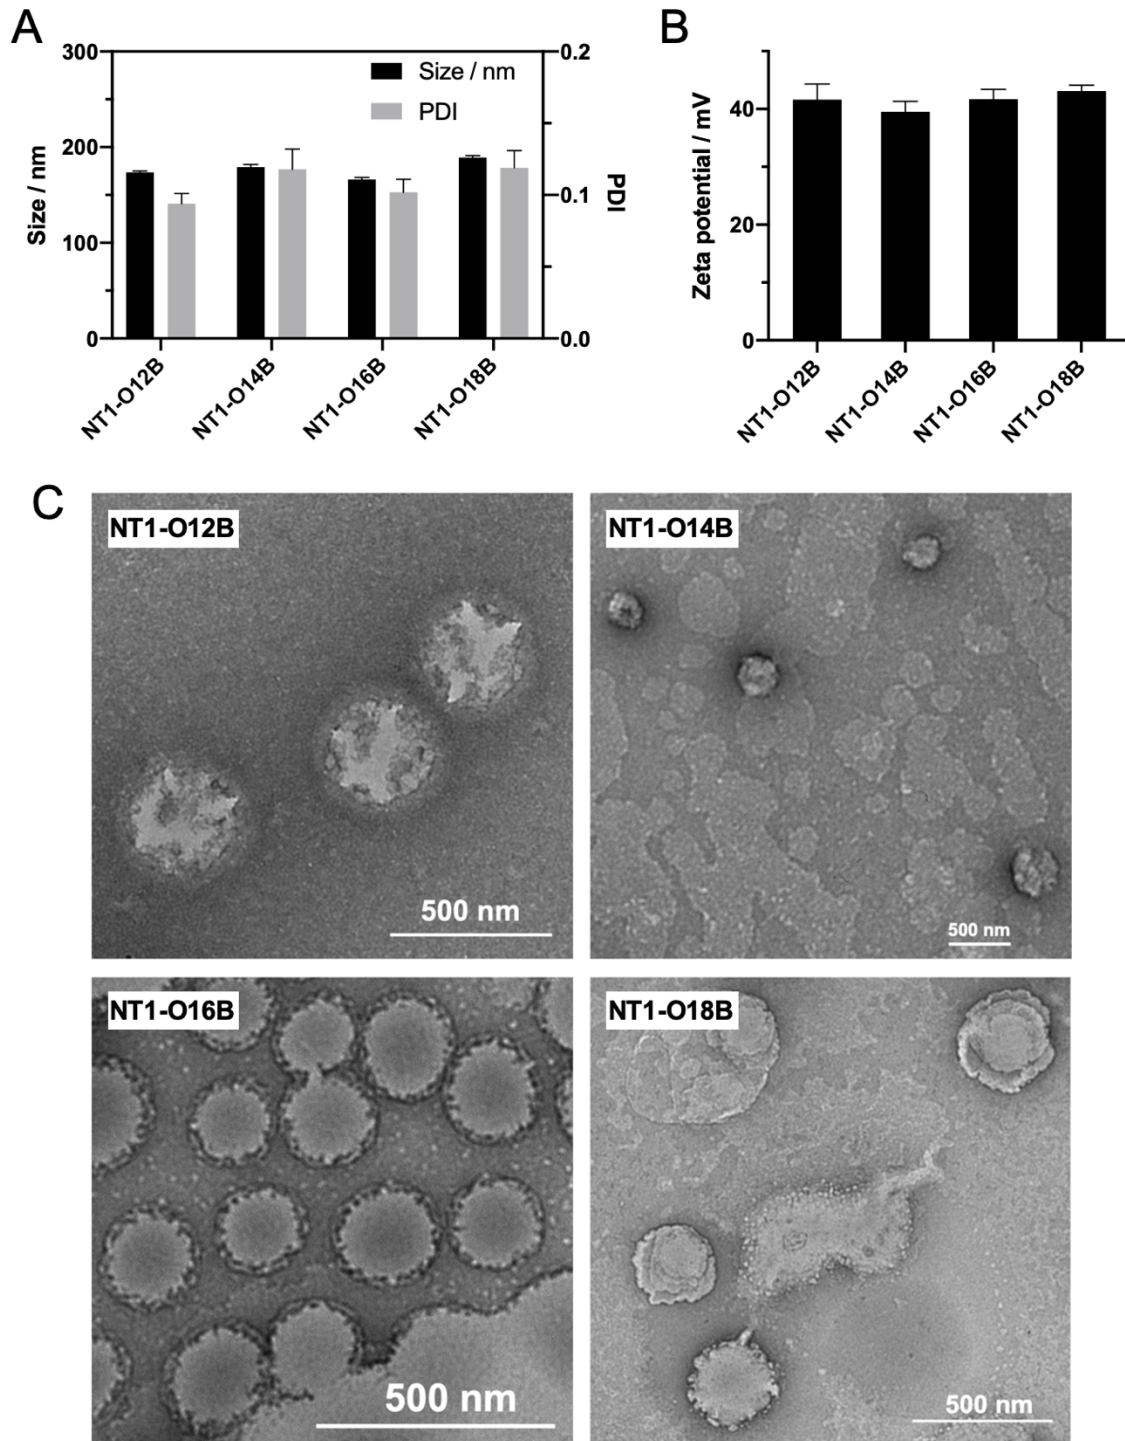

**Fig. S2. Characterization of NT1-LNPs.** (A) Hydrodynamic diameters and polydispersity indexes of NT1-LNPs determined by DLS measurements. (B) Zeta potential of NT1-LNPs. (C) TEM of of NT1-LNPs.

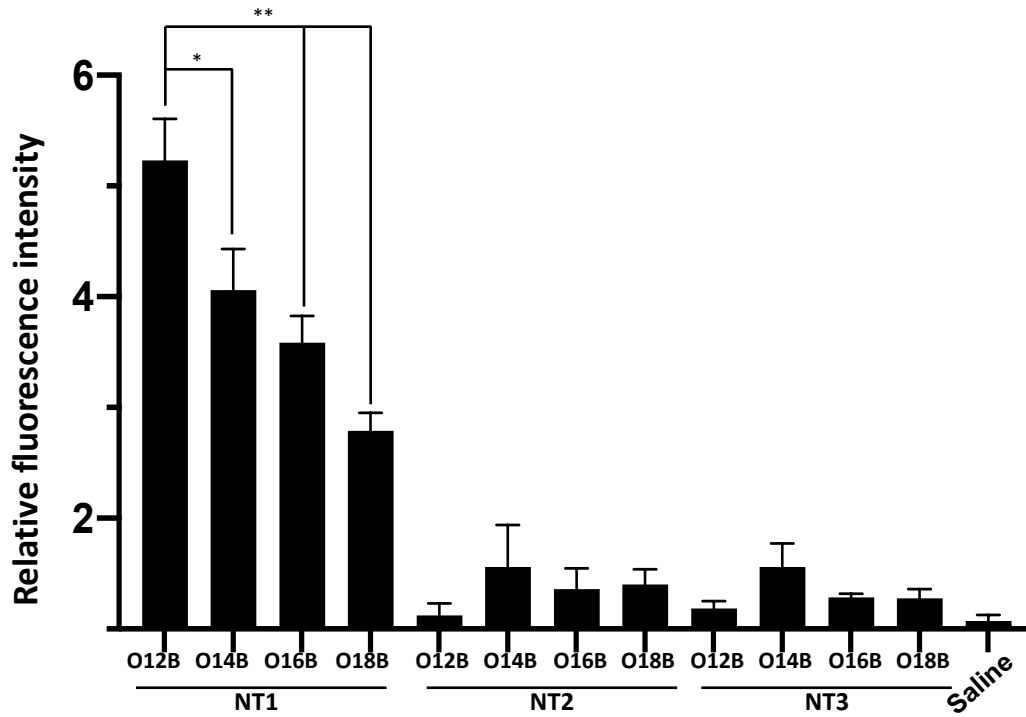

**Fig. S3. Summarized relative fluorescence intensity of the dissected brain tissue after intravenous injection of DiR-labeled NT-LNPs.** The brain tissues were collected 1 h after one-time intravenous injection of  $1 \text{ mg kg}^{-1}$  DiR-labeled NT-LNPs. DiR was doped into the NT-LNPs with a 10% weight ratio. The mice were perfused with saline before dissection. One-way ANOVA, Sidak post hoc analysis, \* $p < 0.05$  or \*\* $p < 0.01$ .

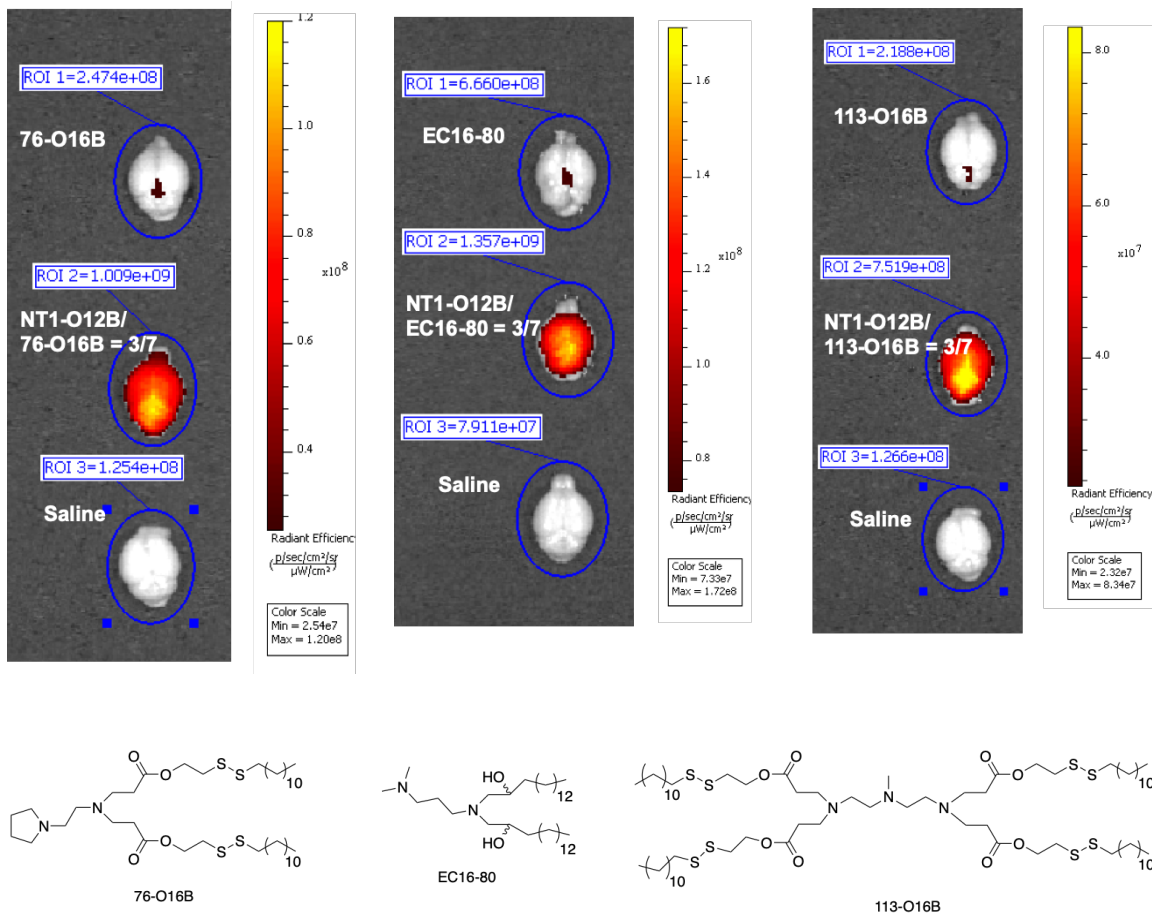

**Fig. S4. BBB-permeability of BBB-impermeable lipid formulations after doping with NT1-O12B lipidoids.** The representative *ex vivo* fluorescence images of the dissected brain 1 h after one-time intravenous injection of  $1 \text{ mg kg}^{-1}$  DiR-labeled LNPs or NT1-O12B doped NT-LNPs (ratio 3:7, w/w), and the chemical structure of 76-O16B, EC16-80, and 113-O16B. DiR was doped into the NT-LNPs with a 10% weight ratio. The mice were perfused with saline before dissection.

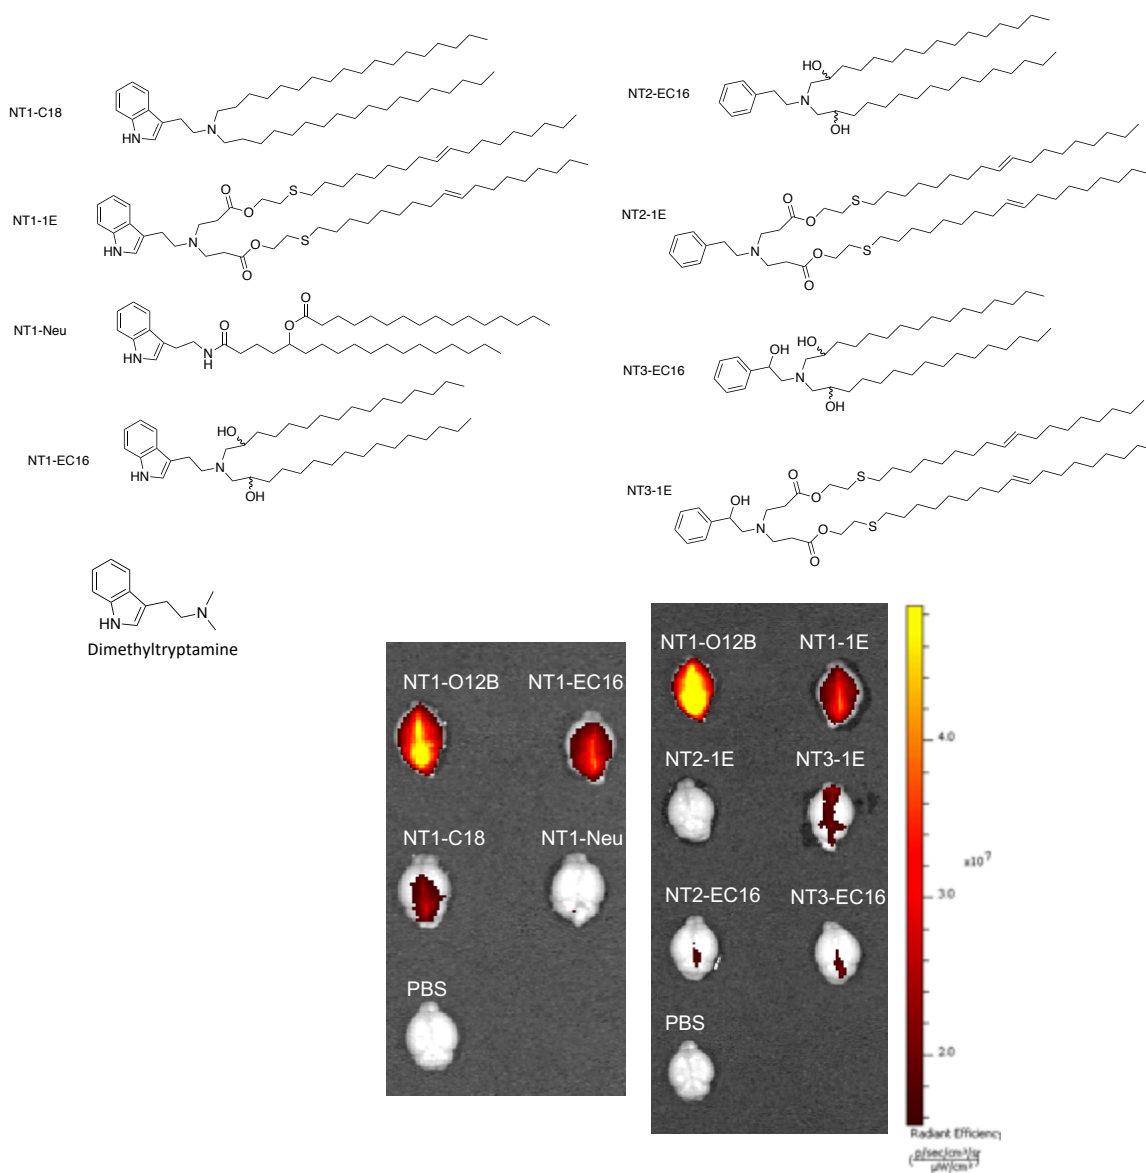

**Fig. S5. BBB-permeability of NT-lipidoids with different chemical structures.** Chemical structure of NT-lipidoids and dimethyltryptamine, and the representative *ex vivo* fluorescence images of the dissected brain 1 h after one-time intravenous injection of  $1 \text{ mg kg}^{-1}$  DiR-labeled NT-LNPs. DiR was doped into the NT-LNPs with a 10% weight ratio. The mice were perfused with saline before dissection.

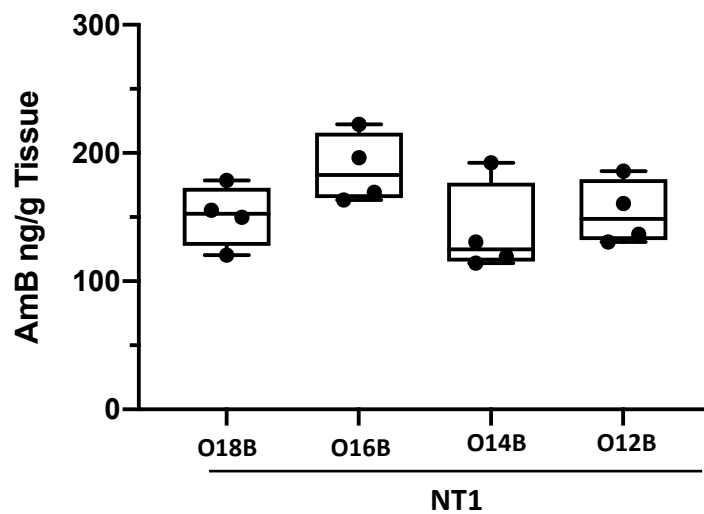

**Fig. S6. Delivery of AmB to mouse brain using pure NT1-lipidoids formulations.** AmB concentration in brain tissues 24hr after intravenous injection of 5 mg/kg AmB in various of NT1 derivatives measured using HPLC. The mice were perfused with saline before dissection.

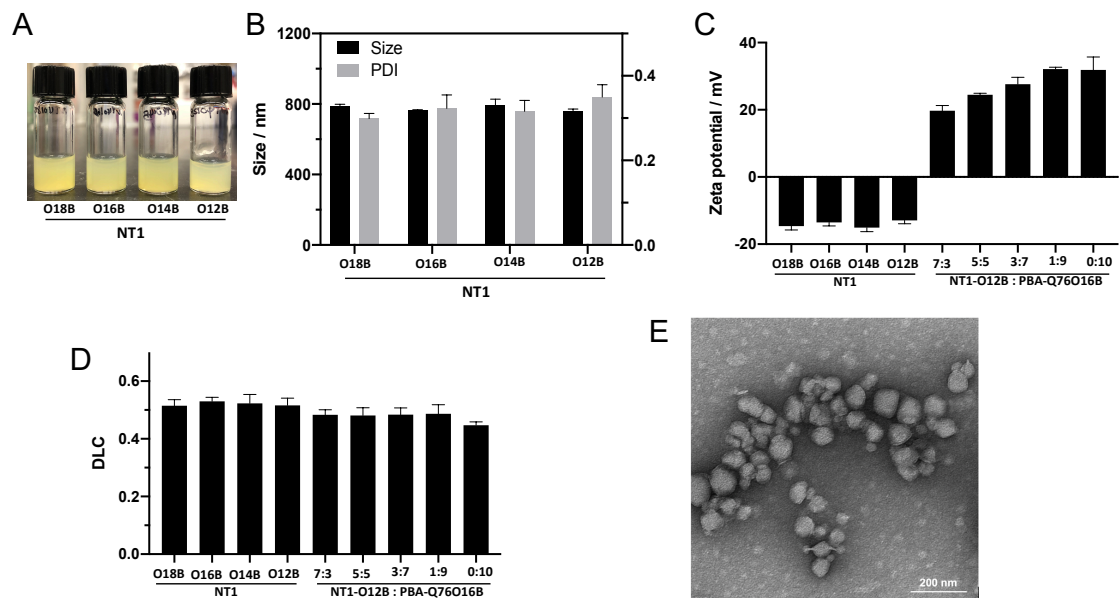

**Fig. S7. Characterization of different NT-LNP /AmB formulations.** (A) Photographs of AmB formulations in NT1-lipidoids with different tail lengths (O18B, O16B, O14B, O12B). All four NT1/AmB encapsulates showed opaque suspension. Photo Credit: Feihe Ma, Tufts University. (B) Hydrodynamic diameters and polydispersity indexes of NT-LNP /AmB formulations determined by DLS measurements. (C) Zeta potential of NT-LNP /AmB formulations. (D) DLC of NT-LNP /AmB formulations. (E) TEM of NT1-O12B/PBA-Q76O16B-3/7-AmB complex.

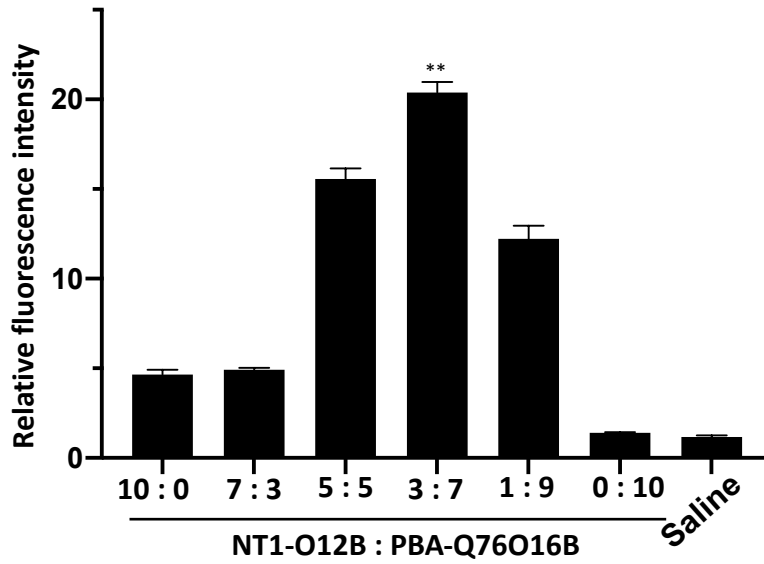

**Fig. S8. Summarized relative fluorescence intensity of the dissected brain tissue after intravenous injection of DiR-loaded NT1-O12B/PBA-Q76-O16B LNPs.** The dissected brain tissues were collected 1 h after one-time intravenous injection  $1 \text{ mg kg}^{-1}$  DiR-loaded NT1-O12B/PBA-Q76-O16B LNPs. The weight ratio of DiR in LNPs is 10%. \*\* $p < 0.001$ . One-way ANOVA, Sidak post hoc analysis.

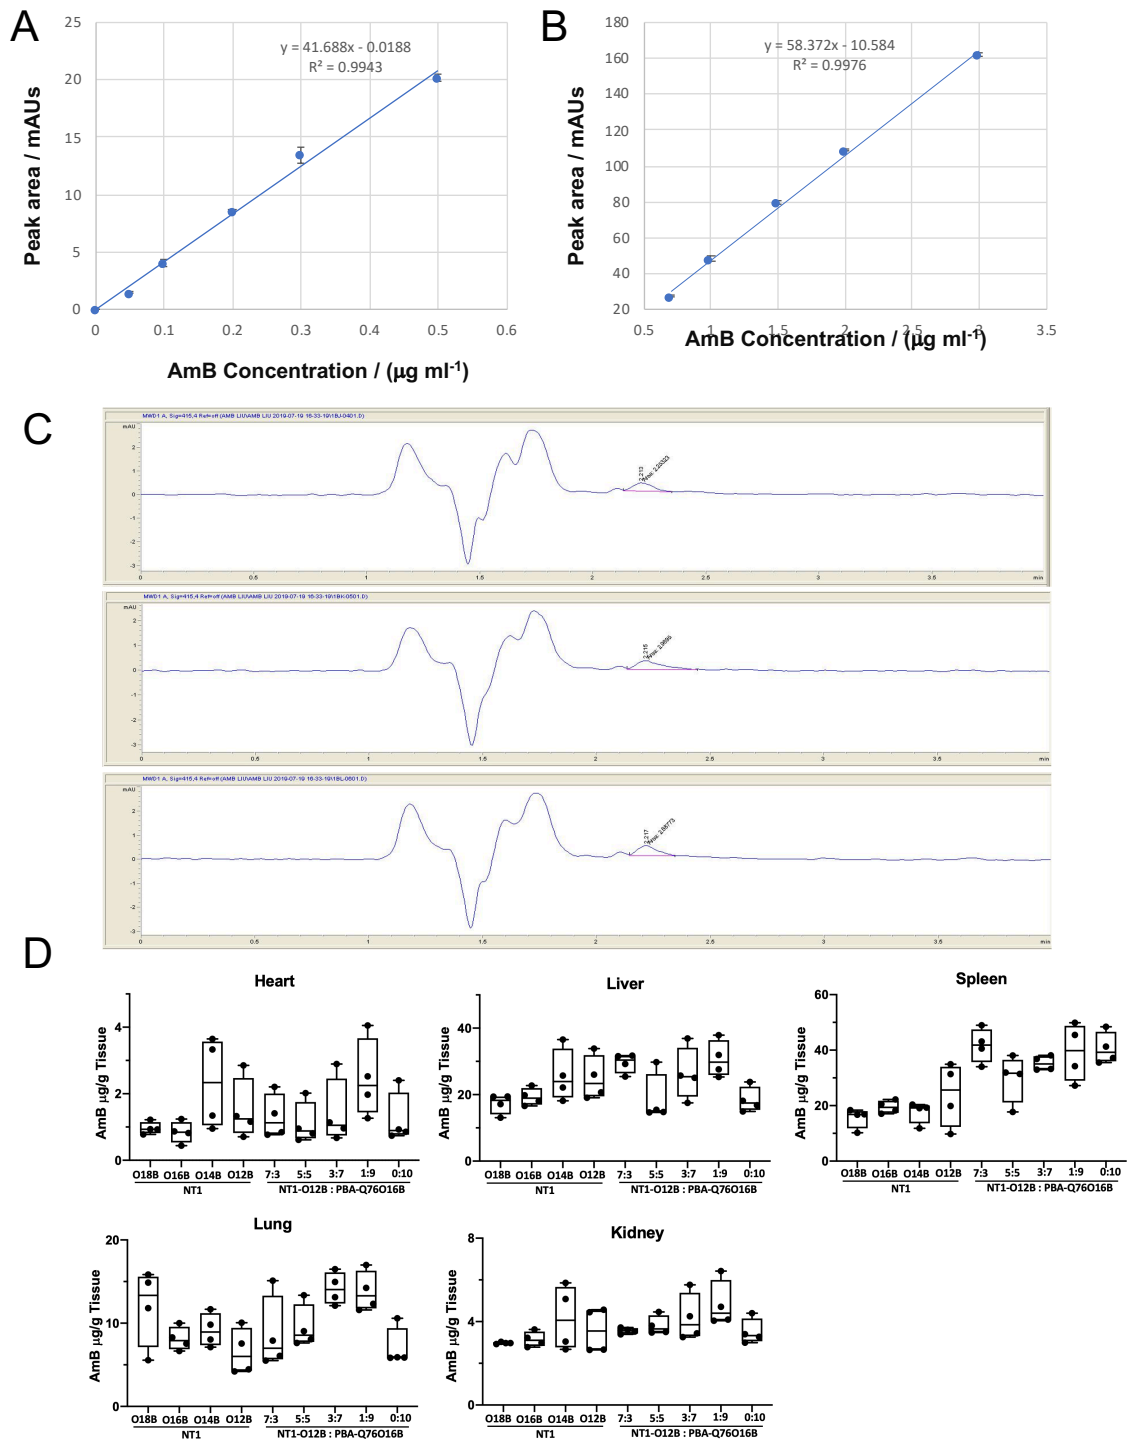

**Fig. S9.** Calibration curve, the mAU-time graphs and tissue biodistribution of AmB concentration determined by HPLC. (A, B) The calibration curve of AmB concentration dissolved in methanol ranging from 0.005 to 0.5  $\mu\text{g/mL}$  (A) or 0.6 to 3.0



$\mu\text{g/mL}$  **(B)** at 415 nm by HPLC. **(C)** The mAU-time graphs of AmB concentrations in brain tissues 24hr after intravenous treatment with NT1-O12B/PBA-Q76O16-LNPs (ratio: 3/7)-AmB complex at a single dose of 5 mg AmB/kg by HPLC. **(D)** The AmB concentrations in other organs 24hr after intravenous injection of 5 mg/kg AmB measured by HPLC. The mice were perfused with saline before dissection.

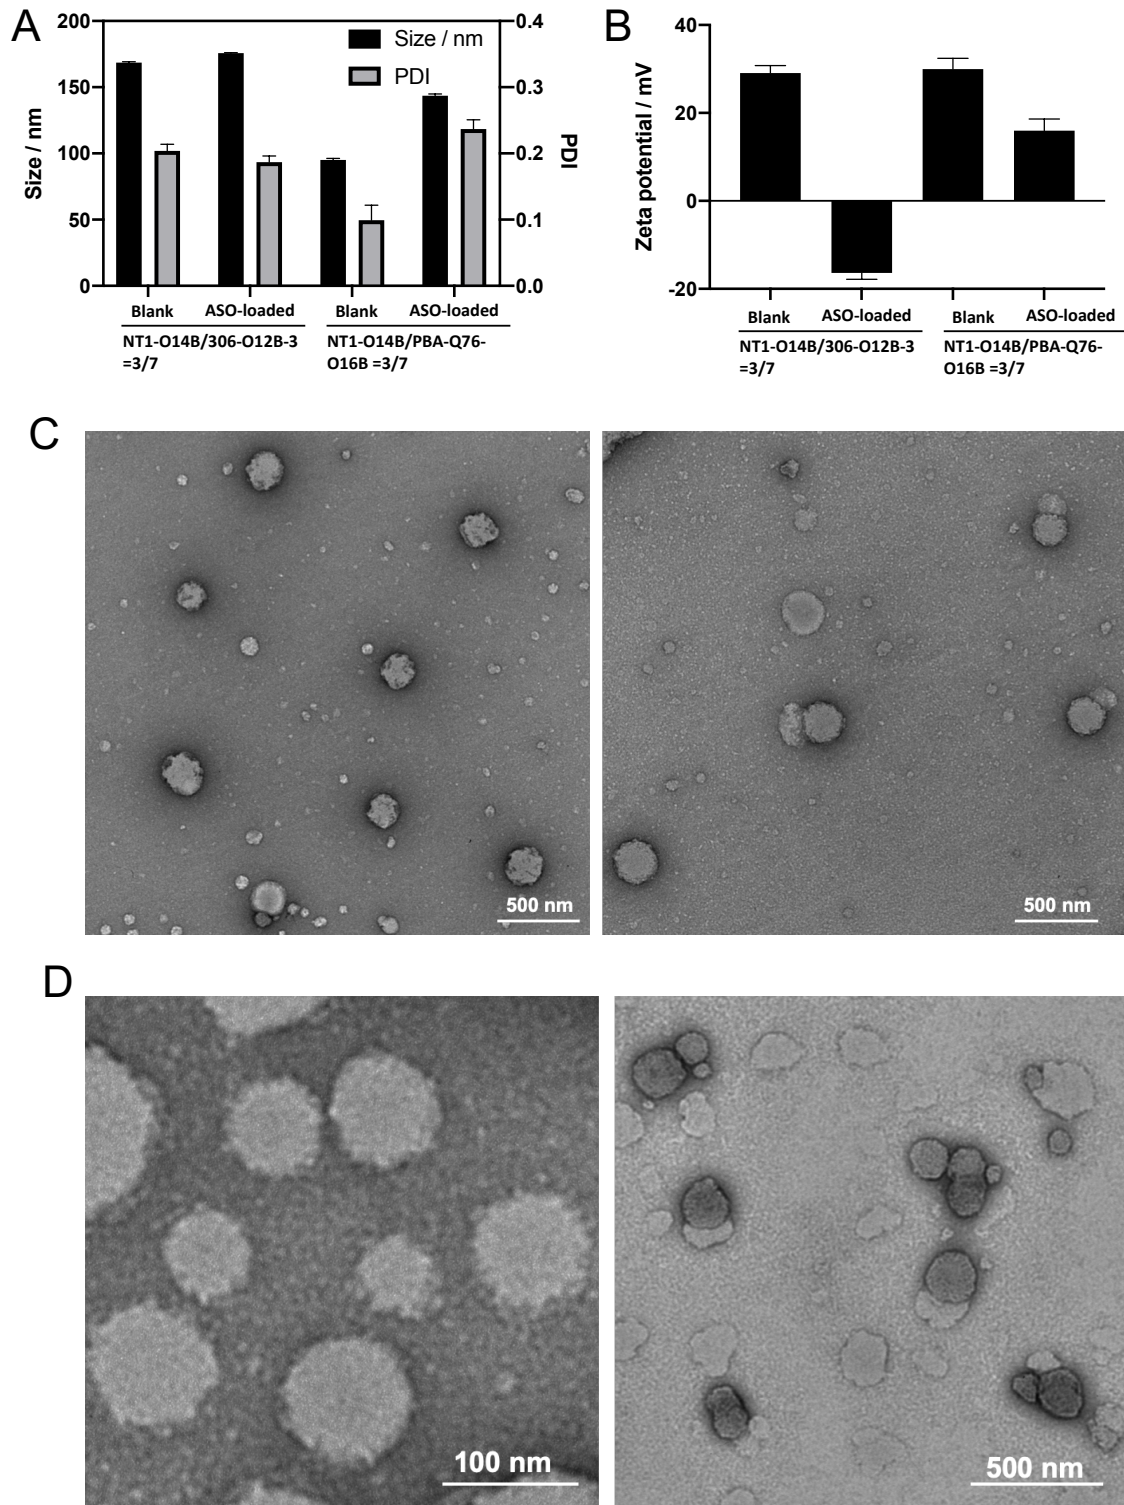

**Fig. S10. Characterization of ASO/NT1-lipidoid and GFP-Cre/NT1-lipidoid nanoparticles formulations. (A) Hydrodynamic diameters and polydispersity indexes of**

blank or cargo loaded ASO/NT1-lipidoid and GFP-Cre/NT1-lipidoid nanoparticles formulations. **(B)** Zeta potential of blank or cargo loaded ASO/NT1-lipidoid and GFP-Cre/NT1-lipidoid nanoparticles formulations. **(C)** TEM of blank (left) and ASO loaded (right) NT1-O14B/306-O12B-3 (ratio: 3/7) nanoparticles. **(D)** TEM of blank (left) and (-27)GFP-Cre loaded (right) NT1-O14B/PBA-Q76O16B (ratio: 3/7) nanoparticles.
